# Supplementary material for: Redox and photoisomerization switching of the second-order optical nonlinearity of a tetrathiafulvalene derivative of spiropyran across five states: a DFT study
Source: Royal Society of Chemistry journal article supplement (doi:10.1039/c2cp23293f), 2012-01-01
Supplement: c2cp23293f.pdf [file c2cp23293f.pdf]

## Supporting Information

### Redox and Photoisomerization Switching of the Second-Order Optical Nonlinearity of a Tetrathiafulvalene Derivative of Spiropyran Across Five States: A DFT Study

Chun-Guang Liu\* and Xiao-Hui Guan

*College of Chemical Engineering, Northeast Dianli University Jilin City, 132012,  
P. R. China*

Table S1. Annihilation of the Spin Contaminant for All Open-shell Systems

| Compounds                                      | Before | After  |
|------------------------------------------------|--------|--------|
| <sup>2</sup> <b>1-c</b> <sup>1e</sup> oxidized | 0.7538 | 0.7500 |
| <sup>2</sup> <b>1-o</b> <sup>1e</sup> oxidized | 0.7577 | 0.7502 |
| <sup>3</sup> <b>1-c</b> <sup>2e</sup> oxidized | 2.0176 | 2.0002 |
| <sup>3</sup> <b>1-o</b> <sup>2e</sup> oxidized | 2.0480 | 2.0013 |

---

\* corresponding author  
E-mail addresses: liucg407@163.com
